# Supplementary material for: Contribution of Mesenchymal Stem Cells from Obese Adipose Tissue to PD-L1 Over-Expression and Breast Cancer Progression through Pathogenic Th17 Cell Activation
Source: MDPI journal article supplement (doi:10.3390/cancers15112963), 2023-05-29
Supplement: s1 [file s1]

## Supplementary Material

### Contribution of Mesenchymal Stem Cells from Obese Adipose Tissue to PD-L1 Over-Expression and Breast Cancer Progression through Pathogenic Th17 Cell Activation

Ferdinand Blangero <sup>1</sup>, Maud Robert <sup>1,2</sup>, Thomas Andraud <sup>1</sup>, Charles Dumontet <sup>3</sup>, Hubert Vidal <sup>1</sup> and Assia Eljaafari <sup>1,4,\*</sup>

<sup>1</sup> CarMeN Laboratory, INSERM U1060, INRAE U1397, University Claude Bernard Lyon Hospices Civils de Lyon, Centre Hospitalier Lyon Sud, 69310 Pierre Bénite ; France;

<sup>2</sup> Bariatric Surgery Department, Edouard Herriot Hospital, 69003 Lyon, France;

<sup>3</sup> Center of Research in Cancerology of Lyon, INSERM U1052, CNRS 5286, University Claude Bernard Lyon 1, Centre Léon Berard, 69008 Lyon, France;

<sup>4</sup> Research Department, Hospices Civils de Lyon, 69002 Lyon; France

\* Correspondence: assia.eljaafari@univ-lyon1.fr. T

**Table S1.** Primers for Human transcripts used in real-time PCR

| Gene name    | 5'-3' sequence                                                     | Amplicon size, bp | RefSeq number |
|--------------|--------------------------------------------------------------------|-------------------|---------------|
| PPIF         | F : GGCTACAAAGGCTCCACCTTC<br>R : GAAAGCGGCTTCCGTAGATG              | 112               | NM_005729     |
| IL-6         | F : AGCCCTGAGAAAGGAGACATGTAACAAG<br>R : TTCTGCAGGAAGTGGATCAGGACTTT | 273               | NM_000600     |
| IL-1 $\beta$ | F : GGCAATGAGGATGACTTGTT<br>R : TGTAGTGGTGGTCGGAGATT               | 124               | NM_000576     |
| IL-8         | F : TTCTGCAGCTCTGTGTGAAG<br>R : ACAGAGCTCTCTCCATCAG                | 187               | NM_000584     |
| VEGF-A       | F : AGTACCCTGATGAGATCGAG<br>R : TATGTGCTGGCCTTGGTGAG               | 161               | NM_001025366  |
| MMP-9        | F : GGGAAGATGCTGCTGTTCA<br>R : TTCAACTCACTCCGGGAAGT                | 203               | NM_004994     |
| CD-274       | F : CTGCAGGGCATTCCAGAAAAG<br>R : GTTCAGCAAATGCCAGTAGG              | 71                | NM_001314029  |
| CX3CR1       | F : AGAGGCTGGTTCTTACGATG<br>R : CAGGTTGGCAGTAGCATGAA               | 170               | NM_001171172  |
| CyclinD1     | F : CTTCTCTCCAAAATGCCAG<br>R : AGGGCGGATTGGAAATGAAC                | 113               | NM_053056     |

**A**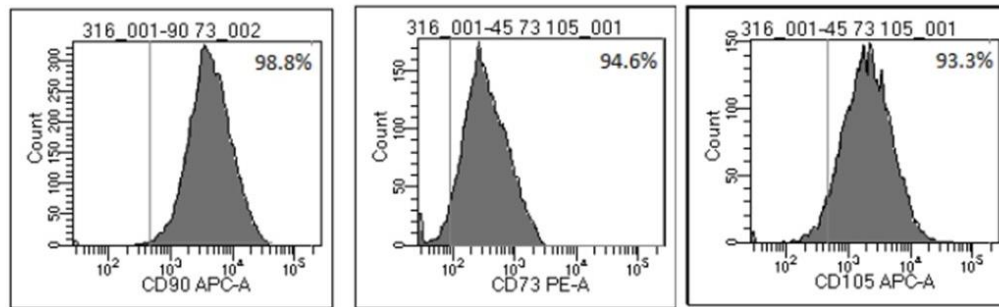**B**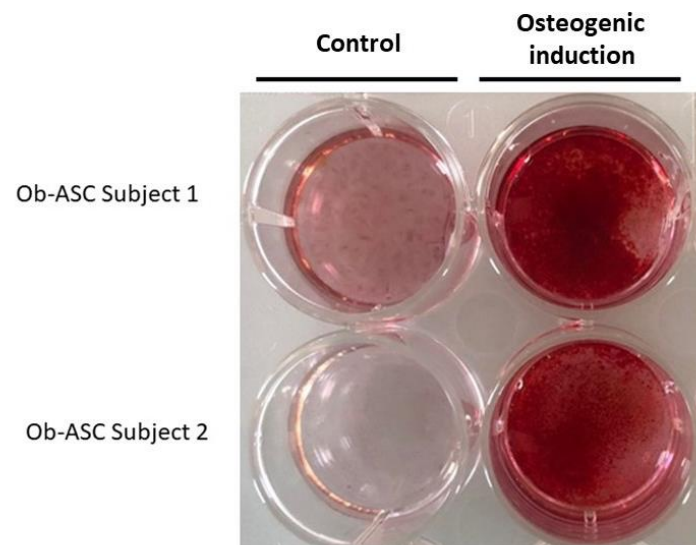

**Supplementary Figure S1. Characterization of Adipose tissue-derived-mesenchymal stem cells (ASC).**

**(A)** ASC were stained for CD90, CD73 and CD105. The expression of these surface molecules was measured by flow cytometry. This figure is representative of 3 experiments. **(B)** ASC were differentiated or not (as control) into osteoblasts using osteoblast differentiation medium for 14 days and stained with alizarin red (calcium deposits).

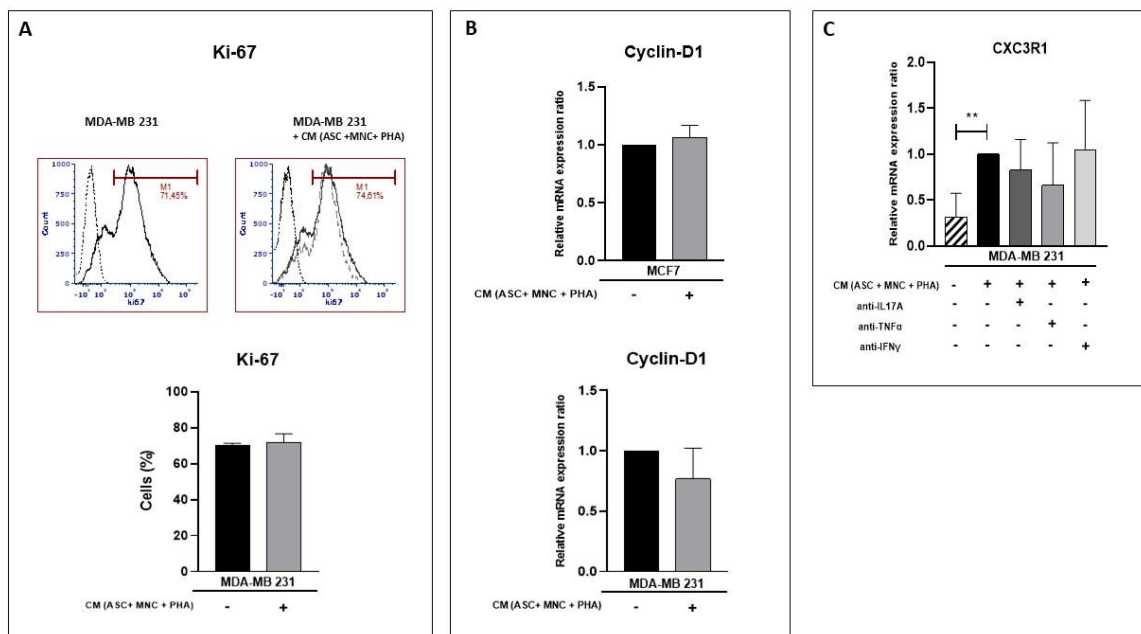

**Supplementary Figure S2. CM from activated co-cultures does not influence BCCL proliferation , but migration**

**(A)** MDA-MB-231 cells ( $0.3 \times 10^5$  cells) were cultured for 24 hours with or without CM harvested from with PHA activated ob-ASC/MNC co-cultures and Ki67 expression were measured by flow cytometry. Overlays correspond to isotypic control (hatched-black) versus Ki67 in MDA-MB231(solid-black) or MDA-MB231 plus CM (hatched-grey). Statistical analysis of 3 experiments is shown. **(B)** CyclinD1 mRNA expression levels were measured in each BCCL by qRT-PCR and results were normalized to PPIF. **(C)** MDA-MB 231 were cultured with CM harvested from PHA-ob-ASC/MNC cocultures plus or minus (i) A/IL-17A, (ii) A/ TNFα or (iii) A IFNγ. CX3CR1 expression levels were measured by qRT-PCR and results were normalized to PPIF. \* represent  $p < 0.05$  as obtained by the one way ANOVA followed by Fisher LSD multiple comparison tests.

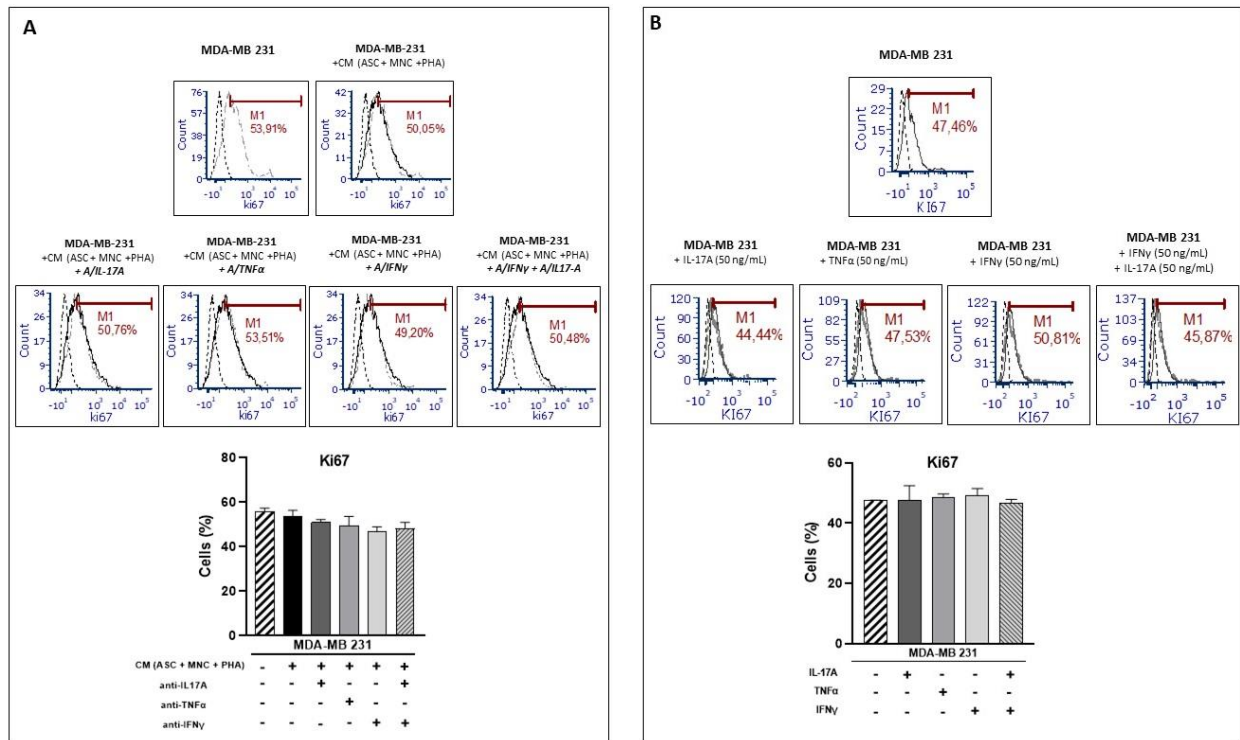

**Supplementary Figure S3: MDA-MB 231 cell proliferation is not influenced by pathogenic Th17cell cytokines**

**(A)** MDA-MB-231 cells ( $0.3 \times 10^5$  cells) were cultured for 24 hours with or without CM harvested from with PHA activated ob-ASC/MNC co-cultures plus or minus A/IL-17A, (ii) A/ TNF-  $\alpha$ , (iii) A/ IFN- $\gamma$  mAbs or (iv) combination of A/IL-17A and A/IFN- $\gamma$  mAbs and Ki67 expression were measured by flow cytometry. **(B)** MDA-MB-231 cells ( $0.3 \times 10^5$  cells) were cultured for 24 hours with or without recombinant human (i)IL-17A (50 ng/mL), (ii) TNF $\alpha$  (50 ng/mL), (iii) IFN $\gamma$  (50 ng/mL) and (iv) combination of IL-17A (50 ng/mL) and IFN $\gamma$  (50 ng/mL) Ki67 expression were measured by flow cytometry. Overlays correspond to isotypic control (hatched-black) versus Ki67 in MDA-MB 231(solid-black) or MDA-MB231 plus cytokines (grey). Statistical analysis of 3 experiments is shown.

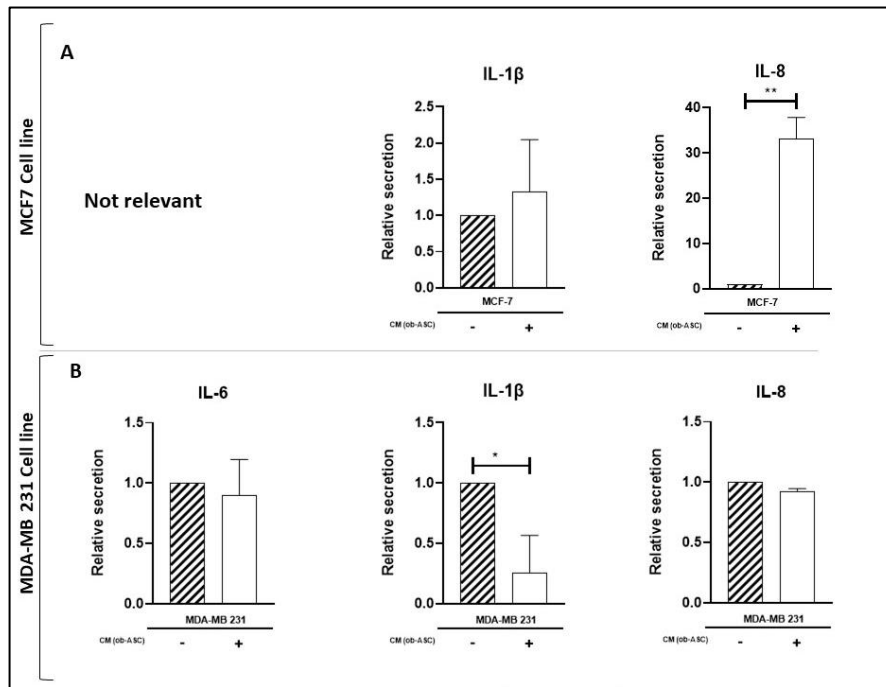

**Supplementary Figure S4 : BCCL cytokine secretion profile following culture with Ob--ASC CM**

MCF7 and MDA-MB-231 cells ( $1 \times 10^5$  cells/well) cells were cultured for 24h with CM harvested from ob-ASC alone. **(A,B)** Cell culture supernatants were analyzed by ELISA. Error bars represent standard deviations (SD) from  $n = 3$  independent experiments. \*, \*\* represent  $p < 0.05$ ,  $p < 0.01$ , respectively, as obtained by the one-way ANOVA, followed by Fisher LSD multiple comparison tests.

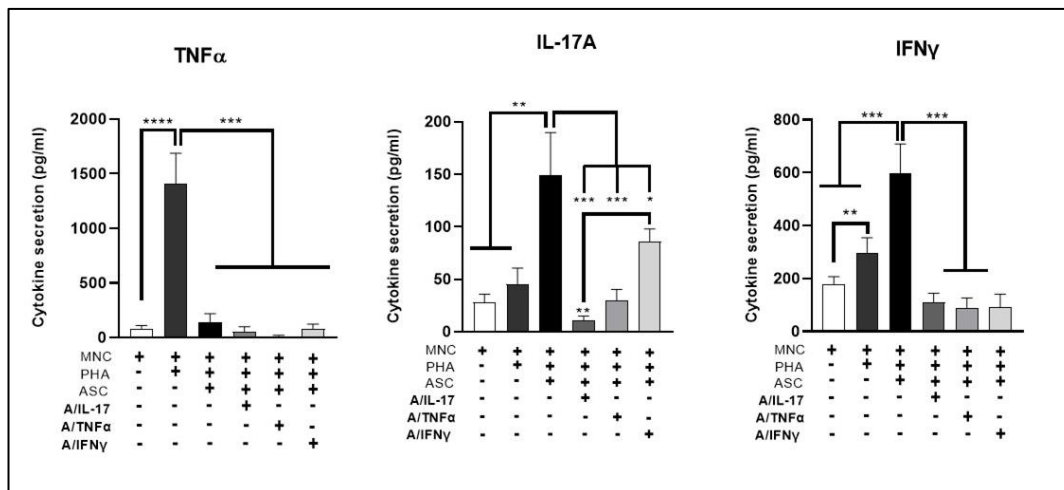

**Supplementary Figure S5. Neutralization of T cell cytokines in ob-ASC/MNC cocultures, and residual cytokine levels among CM**  
MNC from healthy donors were activated or not with PHA (5 $\mu$ g/mL) and co-cultured with ob-ASC (5:1 ratio) (i) plus or minus A/IL-17A, (ii) A/ TNF $\alpha$  or (iii) A/ IFN $\gamma$  mAbs. 48h later, cytokine secretion was analyzed by ELISA for TNF $\alpha$ , IL-17A and IFN $\gamma$  secretion. .  
\*, \*\*, \*\*\*, \*\*\*\* represent  $p < 0.05$ ,  $p < 0.01$ ,  $p < 0.001$ ,  $p < 0.0001$ , respectively, as obtained by the one way ANOVA followed by Fisher LSD multiple comparison tests.
